# Supplementary material for: Quantitative BrdU immunoprecipitation method demonstrates that Fkh1 and Fkh2 are rate-limiting activators of replication origins that reprogram replication timing in G1 phase
Source: HighWire-hosted journal article supplement (doi:10.1101/gr.196857.115), 2016-01-04
Supplement: TableS1.docx [file TableS1.docx]

| **GENE** | **FKH1 OE FOLD CHANGE** | **FKH2 OE FOLD CHANGE** | **FKH1 OE log2 FOLD CHANGE** | **FKH2 OE log2 FOLD CHANGE** | **GO CLASS** |
| --- | --- | --- | --- | --- | --- |
| DPB3 | 1.574 | 2.321 | 0.655 | 1.215 | REPLICATION ANNOTATION |
| ECO1 | 1.979 | 2.222 | 0.985 | 1.152 | REPLICATION ANNOTATION |
| RRM3 | 2.010 | 2.249 | 1.007 | 1.169 | REPLICATION ANNOTATION |
| SIR3 | 1.498 | 2.584 | 0.583 | 1.370 | REPLICATION ANNOTATION |
| CTF3 | 2.015 | 3.493 | 1.010 | 1.804 | REPLICATION INITIATION |
| POL3 | 0.622 | 0.397 | -0.684 | -1.331 | REPLICATION ANNOTATION |
| NOC3 | 0.671 | 0.582 | -0.577 | -0.782 | REPLICATION ANNOTATION |
| DPB2 | 0.584 | 0.516 | -0.776 | -0.954 | REPLICATION ANNOTATION |
| NOC3 | 0.671 | 0.582 | -0.577 | -0.782 | REPLICATION INITIATION |

**Table S1. Differential gene expression in cells overexpressing Fkh1 and Fkh2.**

The table summarizes data from experiments comparing mRNA levels in WT cells to cells with Fkh1-OE or Fkh2-OE, after induction of OE in G1-blocked cells as described in Figure 2A legend.
