# Supplementary material for: Quantitative BrdU immunoprecipitation method demonstrates that Fkh1 and Fkh2 are rate-limiting activators of replication origins that reprogram replication timing in G1 phase
Source: HighWire-hosted journal article supplement (doi:10.1101/gr.196857.115), 2016-01-04
Supplement: TableS2.docx [file TableS2.docx]

Table S2. Genotypes of yeast strains used in this study

| Strain | Genotype | Source |
| --- | --- | --- |
| CVy61 | *MATa, ade2-1, ura3-1, his3-11,15, trp1-1, can1-100, bar1∆::hisG, trp1::BrdU-Inc (TRP1)* | Viggiani and Aparicio, 2006 |
| CVy63 | *MATa, ade2-1, ura3-1, his3-11,15, trp1-1, can1-100, bar1∆::hisG, leu2::BrdU-Inc (LEU2)* | Viggiani and Aparicio, 2006 |
| ZOy14 | *MATa, ade2-1, ura3-1, his3-11,1,5 trp1-1, can1-100, bar1∆::LEU2, FKH1-MYC9 (TRP1)* | Ostrow et al., 2014 |
| JPy88 | CVy63 pGAL (*URA3*) | This study |
| JPy89 | CVy63 pGAL-FKH1 (*URA3*) | This study |
| JPy90 | CVy63 pGAL-FKH2 (*URA3*) | This study |
| JPy103 | CVy61 pGAP-RNR3 (*LEU2*) | This study |
| JPy105 | ZOy14 pGAL (*URA3*) | This study |
| JPy106 | ZOy14 pGAL-FKH1-MYC9 (*URA3*) | This study |
| OAy1069 | *MATα, ade2-1, ura3-1, his3-11,15, trp1-1, can1-100, bar1∆::hisG, fkh1∆::KanMx, leu2::GAL-FKH1* (*LEU2*)*, ars305∆::BrdU-Inc (URA3)* | This study |
| OAy1070 | *MATa, ade2-1, ura3-1, his3-11,15, trp1-1, can1-100, bar1∆::hisG, fkh2∆His3Mx, ars501∆::ARS305* | This study |
| OAy1071 | *MATa, ade2-1, ura3-1, his3-11,15, trp1-1, can1-100, bar1∆::hisG, fkh1∆::KanMx, fkh2∆His3Mx, leu2::GAL-FKH1 (LEU2), ars305∆::BrdU-Inc (URA3), ars501∆::ARS305* | This study |
| OAy1073 | *MATa, ade2-1, ura3-1, his3-11,15, trp1-1, can1-100, bar1∆::hisG, fkh1∆::KanMx, fkh2∆His3Mx, leu2-3,112, ars305∆::BrdU-Inc (URA3), ars501∆::ARS305* | This study |
